# Supplementary material for: Bortezomib, Lenalidomide and Dexamethasone (VRd) vs Carfilzomib, Lenalidomide and Dexamethasone (KRd) as Induction Therapy in Newly Diagnosed Multiple Myeloma
Source: Research Square preprint supplement (doi:10.21203/rs.3.rs-2583053/v1), 2023-02-24
Supplement: Supplementary file 1 [file 3914323506062dd868c8ba5f.xlsx]

## Sheet: Sheet1
Table 2. Treatment and responses
	VRd (N=198)	KRd (N=191)	P-value
Number of cycles - n (%)
1-3	34 (17)	12 (6)	<0.01
4-5	56 (28)	36 (19)	0.02
6-8	90 (45)	114 (60)	<0.01
≥9	18 (9)	29 (15)	0.09
Best overall response to induction - n (%)			<0.01
sCR/CR	49 (25)	79 (41)	<0.01
VGPR	75 (38)	86 (45)	0.12
PR	57 (29)	24 (13)	<0.01
MR	7 (4)	2 (1)	0.18
SD	8 (4)	0 (0)	<0.01
PD	2 (1)	0 (0)	0.25
Minimal residual disease status - n (%)	VRd (N=113)	KRd (N=174)
Negative status*	30 (27)	69 (40)	0.02
*During or after completing induction therapy
