# Supplementary material for: Bortezomib, Lenalidomide and Dexamethasone (VRd) vs Carfilzomib, Lenalidomide and Dexamethasone (KRd) as Induction Therapy in Newly Diagnosed Multiple Myeloma
Source: Research Square preprint supplement (doi:10.21203/rs.3.rs-2583053/v1), 2023-02-24
Supplement: Supplementary file 2 [file 695f451a7c7e1c4a022f0e4a.xlsx]

## Sheet: Sheet1
Table 4A. Multivariable analysis for standard-risk subgroup: PFS and OS
	PFS		OS*
Variable	Hazard Ratio (95%CI)	P-value	Hazard Ratio (95%CI)	P-value
Induction
VRd	1		1
KRd	0.70 (0.40-1.24)	0.2	0.45 (0.16-1.32)	0.15
Gender
Female	1		1
Male	1.02 (0.59-1.77)	>0.9	0.89 (0.34-2.30)	0.8
Age	1.01 (0.98-1.04)	0.4	1.08 (1.02-1.15)	0.003
Cardiac History
Yes	1		1
No	1.12 (0.53-2.37)	0.8	1.5 (0.42-5.38)	0.5
R-ISS Stage
I	1		1
II	1.13 (0.64-1.98)	0.7	0.70 (0.26-1.91)	0.5
III	1.87 (0.43-8.16)	0.4	2.34 (0.42-13.0)	0.3
Early ASCT
No	1		1
Yes	0.79 (0.43-1.46)	0.5	0.70 (0.22-2.18)	0.5
*Multivariate analysis for OS includes patients with follow-up truncated at 5.5 years. Results from landmark analysis at 5.5 years available in Data Supplement.
