# Supplementary material for: Bortezomib, Lenalidomide and Dexamethasone (VRd) vs Carfilzomib, Lenalidomide and Dexamethasone (KRd) as Induction Therapy in Newly Diagnosed Multiple Myeloma
Source: Research Square preprint supplement (doi:10.21203/rs.3.rs-2583053/v1), 2023-02-24
Supplement: Supplementary file 3 [file 76a333c501b3e4a51b4cfbdf.xlsx]

## Sheet: Sheet1
Table 1. Baseline Patient Characteristics
Characteristics	VRd (N=198)	KRd (N=191)	P-value
Median age - yr (IQR)	65 (57 - 72)	62 (55 - 68)	0.006
Age category - n (%)
≤70 yr	138 (69)	152 (80)
>70 yr	61 (31)	37 (20)
Male sex (%)	102 (52)	106 (55)	0.48
Race, n (%)			0.71
White	148 (75)	132 (69)
Black	25 (13)	26 (14)
Asian	7 (4)	10 (5)
Other/unknown	18 (9)	23 (12)
ECOG Performance Status - n (%)			0.51
0	67 (34)	72 (38)
1	66 (33)	50 (26)
≥2	17 (9)	13 (7)
Creatinine Clearance >60mL/min - n (%)	153 (77)	162 (85)	0.28
History of HTN - n (%)	98 (49)	91 (48)	0.76
Cardiac history* - n (%)	45 (23)	24 (13)	0.008
History of Peripheral Neuropathy - n (%)	34 (17)	36 (19)	0.69
Stage (R-ISS) - n (%)			0.43
I	68 (34)	76 (40)
II	101 (51)	89 (47)
III	9 (5)	6 (3)
Missing	20 (10)	20 (10)
Cytogenetic risk - n (%)			0.02
High-risk†	67 (34)	87 (46)
Standard-risk	115 (58)	91 (48)
Missing	16 (8)	13 (7)
del(17p) - n (%)	13 (7)	25 (13)	>0.9
t(4;14) - n (%)	8 (4)	15 (8)	>0.9
t(14;16) - n (%)	3 (2)	7 (4)	>0.9
t(14;20) - n (%)	2 (1)	3 (2)	>0.9
Gain/amp 1q	58 (29)	64 (34)	0.4
Number of high-risk cytogenetic abnormalities - n (%)			0.6
1	51 (26)	63 (33)
≥2	16 (8)	24 (13)
Early ASCT^ - n (%)	98 (49)	94 (49)
*cardiac history include atrial fibrillation, atrial flutter, coronary artery disease, right bundle branch block, valvular heart disease, aortic aneurysm, sick sinus syndrome, systolic heart failure, non-ischemic cardiomyopathy, heart failure with preserved ejection fraction, heart block †high risk include 1q+, t(4;14), t(14;16), t(14;20), del(17p). ^Early ASCT defined as ASCT within 12 months of…
ECOG: Eastern Cooperative Oncology Group performance; ASCT: autologous stem cell transplant
