# Supplementary material for: Bortezomib, Lenalidomide and Dexamethasone (VRd) vs Carfilzomib, Lenalidomide and Dexamethasone (KRd) as Induction Therapy in Newly Diagnosed Multiple Myeloma
Source: Research Square preprint supplement (doi:10.21203/rs.3.rs-2583053/v1), 2023-02-24
Supplement: Supplementary file 4 [file d40de73cb1155387af1450d6.xlsx]

## Sheet: Sheet1
Table 4B. Multivariable analysis for high-risk subgroup: PFS and OS
	PFS		OS*
Variable	Hazard Ratio (95%CI)	P-value	Hazard Ratio (95%CI)	P-value
Induction
VRd	1		1
KRd	0.58 (0.36-0.94)	0.026	0.34 (0.15-0.78)	0.011
Gender
Female	1		1
Male	0.88 (0.54-1.44)	0.6	1.00 (0.44-2.27)	>0.9
Age	0.99 (0.97-1.02)	0.5	1.00 (0.96-1.04)	>0.9
Cardiac History
Yes	1		1
No	0.48 (0.27-0.85)	0.017	0.69 (0.27-1.8)	0.077
R-ISS Stage
I	1		1
II	2.31 (1.26-4.24)	0.007	2.47 (0.83-7.33)	0.1
III	3.30 (1.27-8.55)	0.014	5.92 (1.33-26.4)	0.02
Early ASCT
No	1		1
Yes	0.78 (0.46-1.31)	0.3	0.44 (0.19-1.04)	0.058
*Multivariate analysis for OS includes patients with follow-up truncated at 5.5 years. Results from landmark analysis at 5.5 years available in Data Supplement.
