# Supplementary material for: Bortezomib, Lenalidomide and Dexamethasone (VRd) vs Carfilzomib, Lenalidomide and Dexamethasone (KRd) as Induction Therapy in Newly Diagnosed Multiple Myeloma
Source: Research Square preprint supplement (doi:10.21203/rs.3.rs-2583053/v1), 2023-02-24
Supplement: Supplementary file 5 [file e3b179a589a5c1fb7b5e2076.xlsx]

## Sheet: Sheet1
Table 3. Multivariable analysis for all groups: PFS and OS
	PFS		OS*
Variable	Hazard Ratio (95%CI)	P-value	Hazard Ratio (95%CI)	P-value
Induction
VRd	1		1
KRd	0.68 (0.48-0.98)	0.036	0.43 (0.22-0.81)	0.01
Gender
Female	1		1
Male	1.01 (0.71-1.44)	>0.9	0.99 (0.54-1.82)	>0.9
Age	1.00 (0.98-1.02)	0.8	1.03 (1.00-1.06)	0.094
Cardiac History
Yes	1		1
No	0.78 (0.48-1.31)	0.4	0.98 (0.46-2.07)	>0.9
Cytogenetic risk
Standard	1		1
High	2.23 (1.54-3.22)	<0.001	2.06 (1.13-377)	0.019
R-ISS Stage
I	1		1
II	1.51 (1.03-2.23)	0.036	1.36 (0.70-2.67)	0.4
III	2.26 (1.07-4.76)	0.032	3.47 (1.19-10.1)	0.023
Early ASCT
No	1		1
Yes	0.80 (0.54-1.19)	0.3	0.55 (0.28-1.08)	0.08
*Multivariate analysis for OS includes patients with follow-up truncated at 5.5 years. Results from landmark analysis at 5.5 years available in Data Supplement.
